# Supplementary material for: Combining Pharmacokinetics and Vibrational Spectroscopy: MCR-ALS Hard-and-Soft Modelling of Drug Uptake In Vitro Using Tailored Kinetic Constraints
Source: MDPI journal article supplement (doi:10.3390/cells11091555), 2022-05-05
Supplement: s1 [file s1]

## Supplementary Material

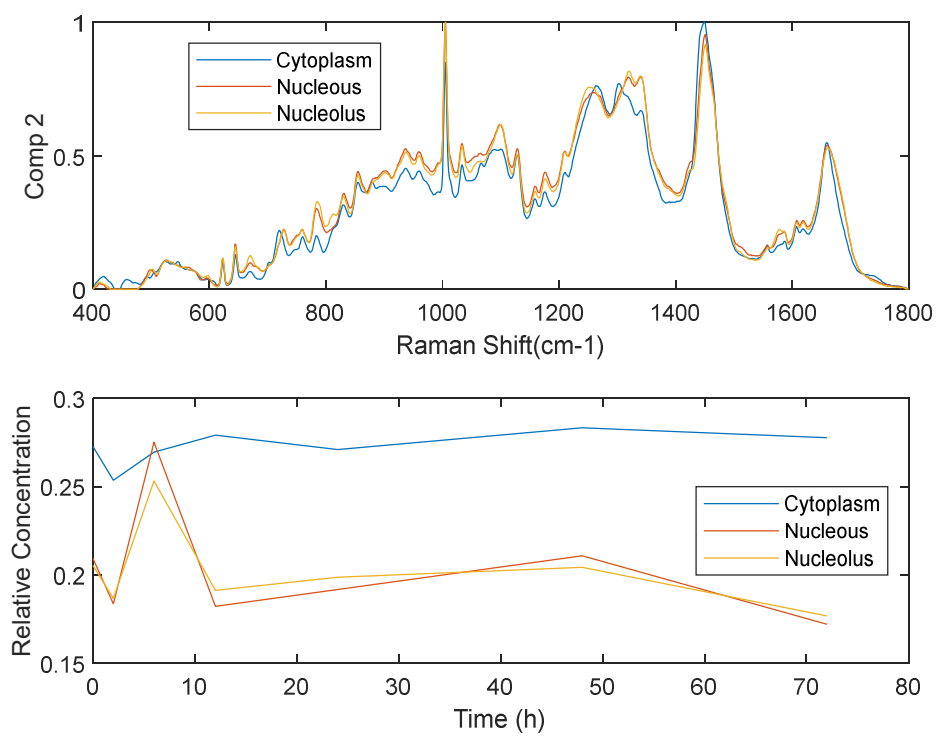

**Supplementary Figure S1.** Comparison of the pure spectra and concentration matrix calculated in section 3.1
